# Supplementary material for: A substrate-trapping strategy to find E3 ubiquitin ligase substrates identifies Parkin and TRIM28 targets
Source: PubMed Central journal article supplement (PMC7576197; doi:10.1038/s42003-020-01328-y), 2020-10-20

**Supplementary Figure 1: Substrate candidates can be efficiently identified by stably expressing the probe.**

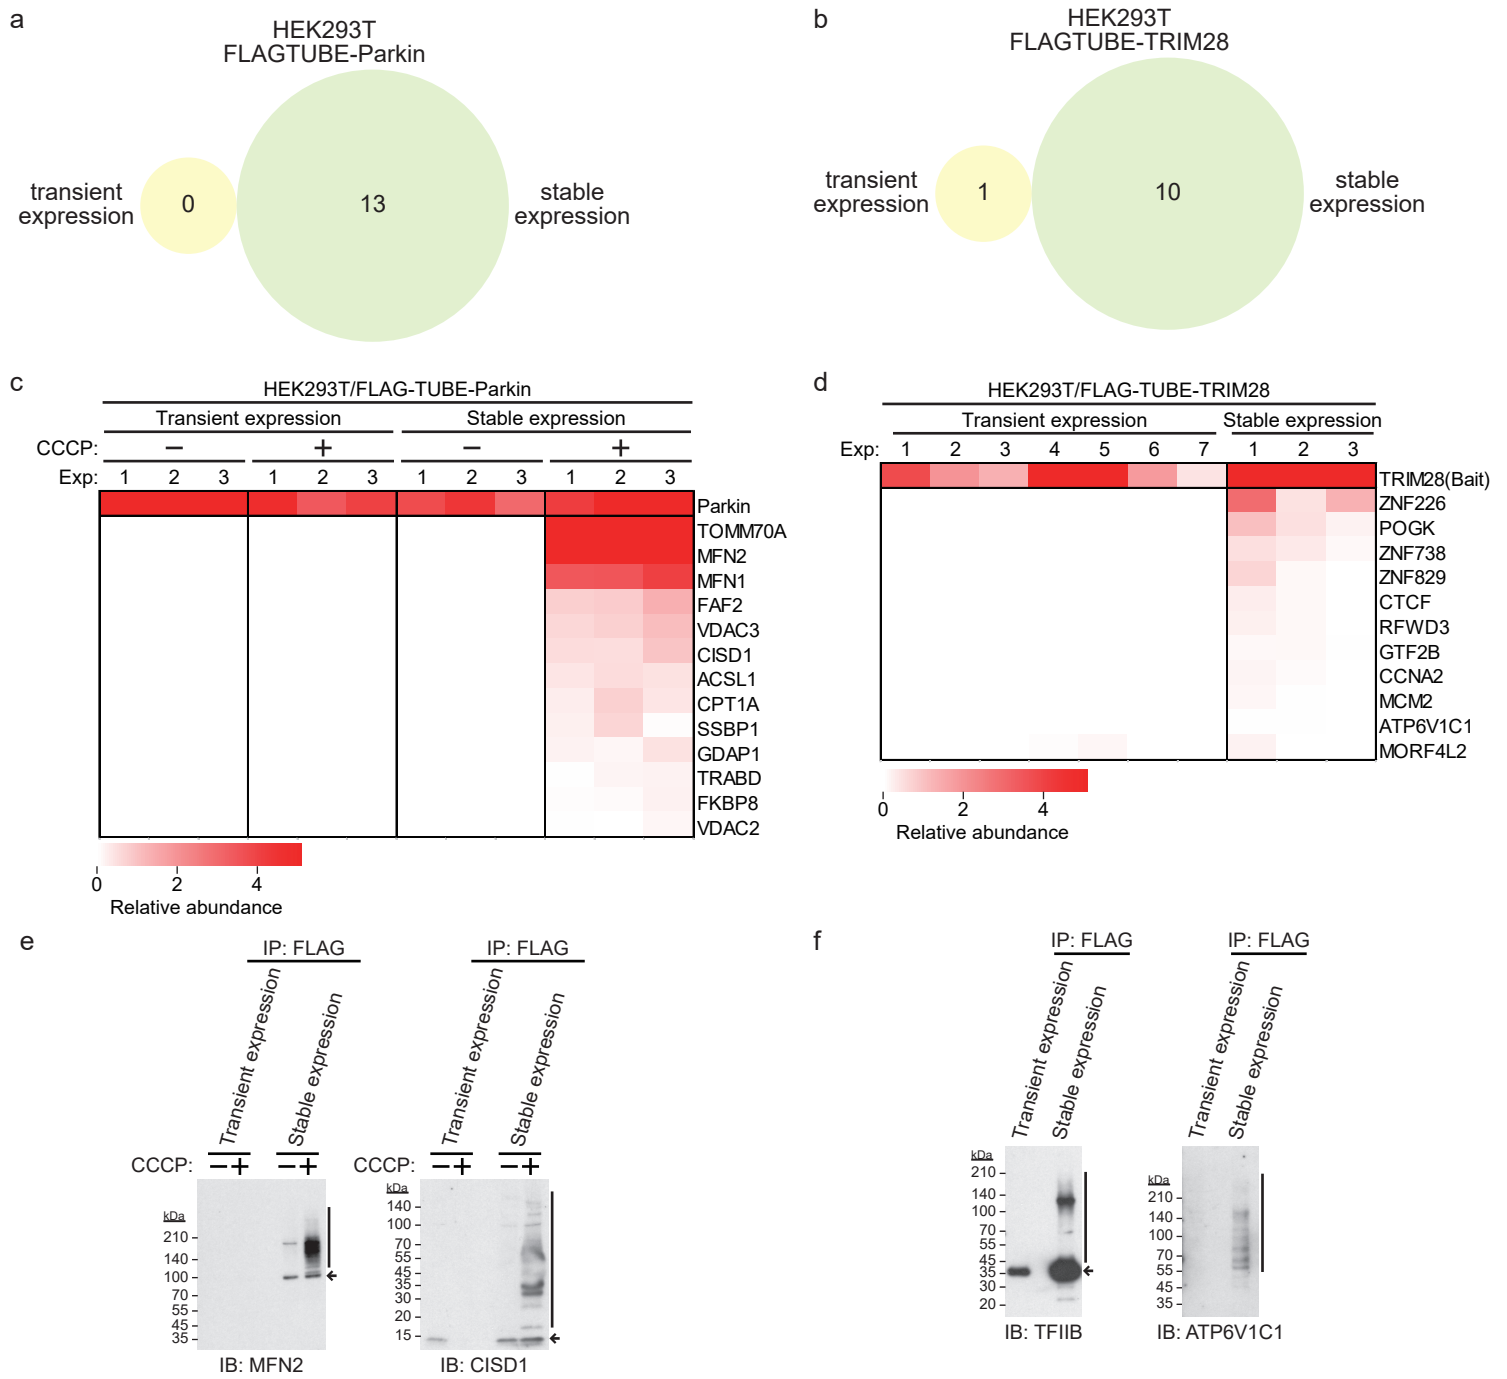

**a, b** Venn diagrams for identified substrate candidates in Parkin experiments with CCCP (10  $\mu$ M) treatment for 1 h (a) and in TRIM28 experiments (b) in HEK293T cells. A probe in which TUBE was fused to the N terminus of each E3 ligase was used. **c, d** Substrate candidates for Parkin (c) and TRIM28 (d). Relative label-free quantification (LFQ) abundance is indicated by the color scale. Proteins with PSMs of >3 in at least one experiment (Exp) and >1 in at least two experiments were considered as substrate candidates for each E3 ligase. **e, f** Detection of ubiquitinated endogenous substrates. Cells expressing the FLAG-TUBE fused probe transiently or stably were harvested and anti-FLAG immunoprecipitates were analyzed by immunoblotting. Vertical bars and arrows denote the positions of ubiquitinated substrates and unmodified substrates, respectively.

**Supplementary Figure 2: Overlapping of substrate candidates between HEK293T and HeLaS3 cells.**

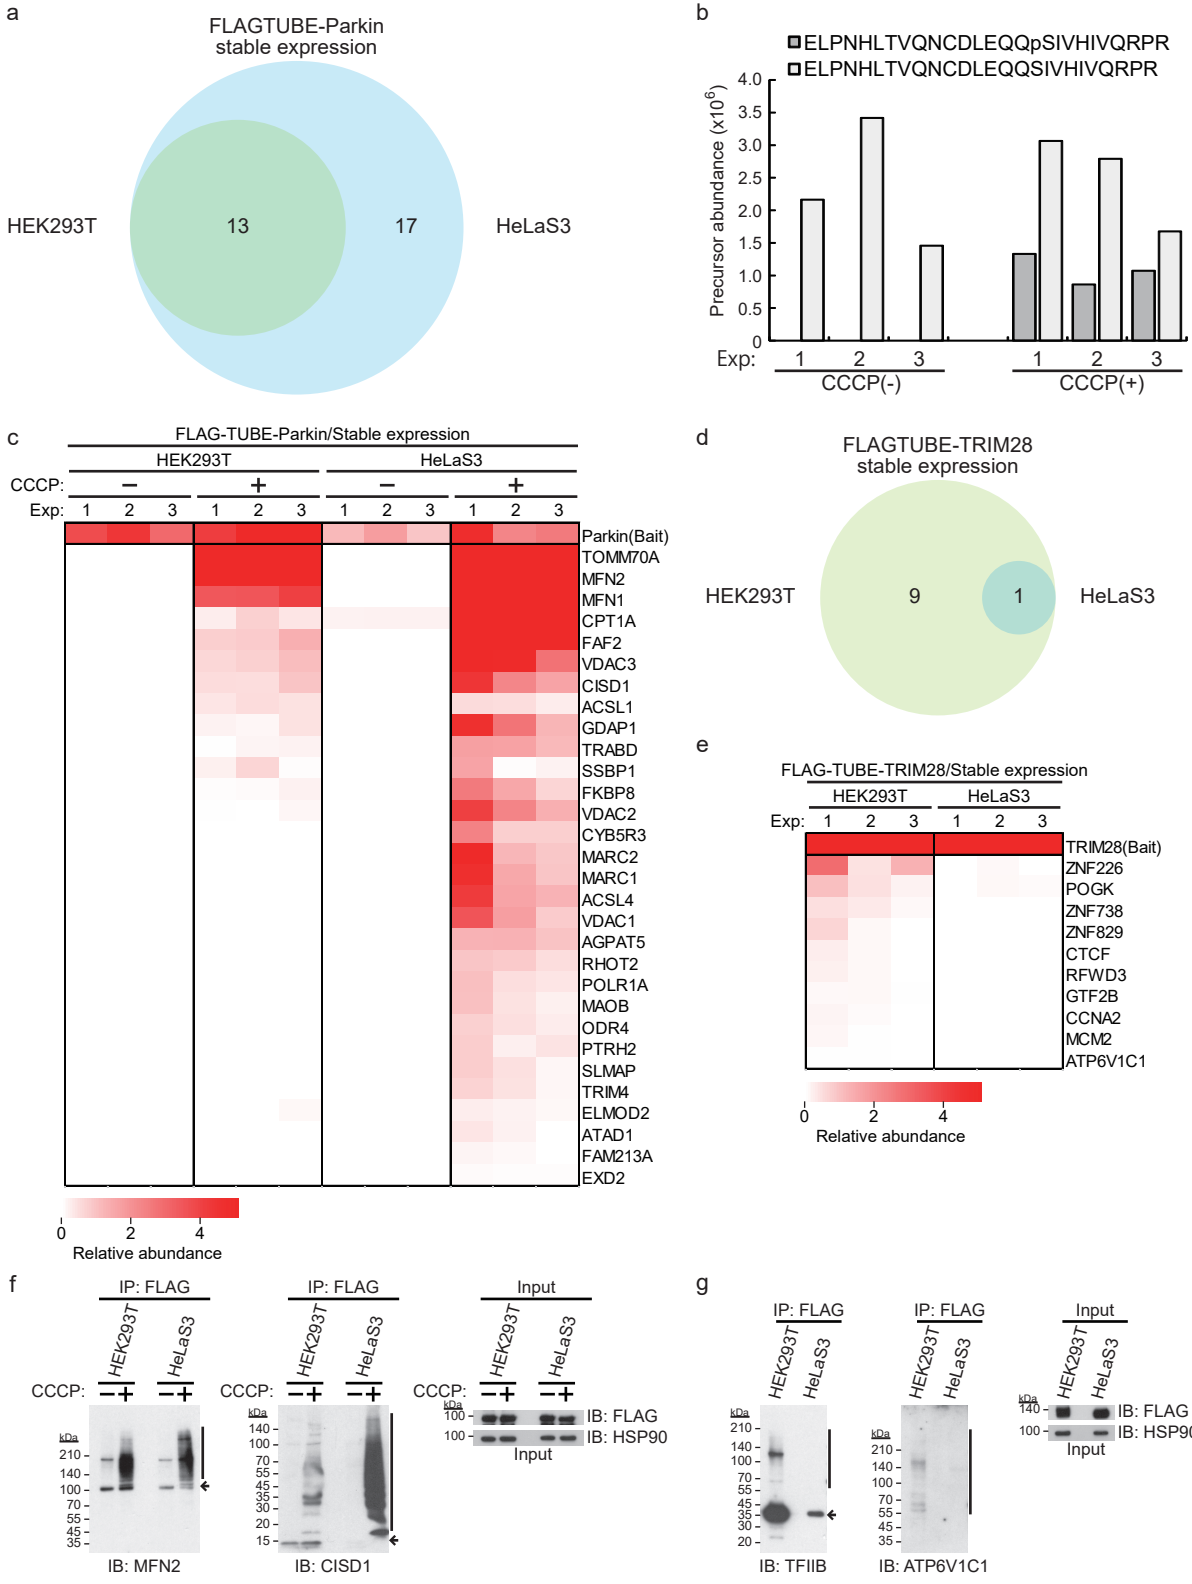

**a, d** Venn diagrams for identified substrate candidates in Parkin experiments with CCCP (10  $\mu$ M) treatment for 1 h (**a**) and TRIM28 experiments (**d**) in HEK293T or HeLaS3 cells stably expressing each probe. Probes in which TUBE was fused to the N terminus of each E3 ligase were used. **b** Detection of Ser 65 phosphorylation of Parkin by MS. HeLaS3 cells expressing the FLAG-TUBE fused probe with (right) or without (left) CCCP (10  $\mu$ M) treatment for 1 h were harvested and anti-FLAG immunoprecipitates were analyzed by MS. LFQ abundance of ELPNHLTVQNCLEQQpSIVHIVQRPR or ELPNHLTVQNCLEQQSIVHIVQRPR peptides of Parkin is shown. Three independent experiments were performed. **c, e** Substrate candidates for Parkin (**c**) and TRIM28 (**e**). Relative label-free quantification (LFQ) abundance is indicated by the color scale. Proteins with PSMs of  $>3$  in at least one experiment (Exp) and  $>1$  in at least two experiments were considered as substrate candidates for each E3 ligase. **f, g** Detection of ubiquitinated endogenous substrates. HEK293T or HeLaS3 cells expressing the FLAG-TUBE fused probe were harvested and anti-FLAG immunoprecipitates were analyzed by immunoblotting. Vertical bars and arrows denote the positions of ubiquitinated substrates and unmodified substrates, respectively.

**Supplementary Figure 3: Validation of the substrate candidates for TRIM28 E3 ligases.**

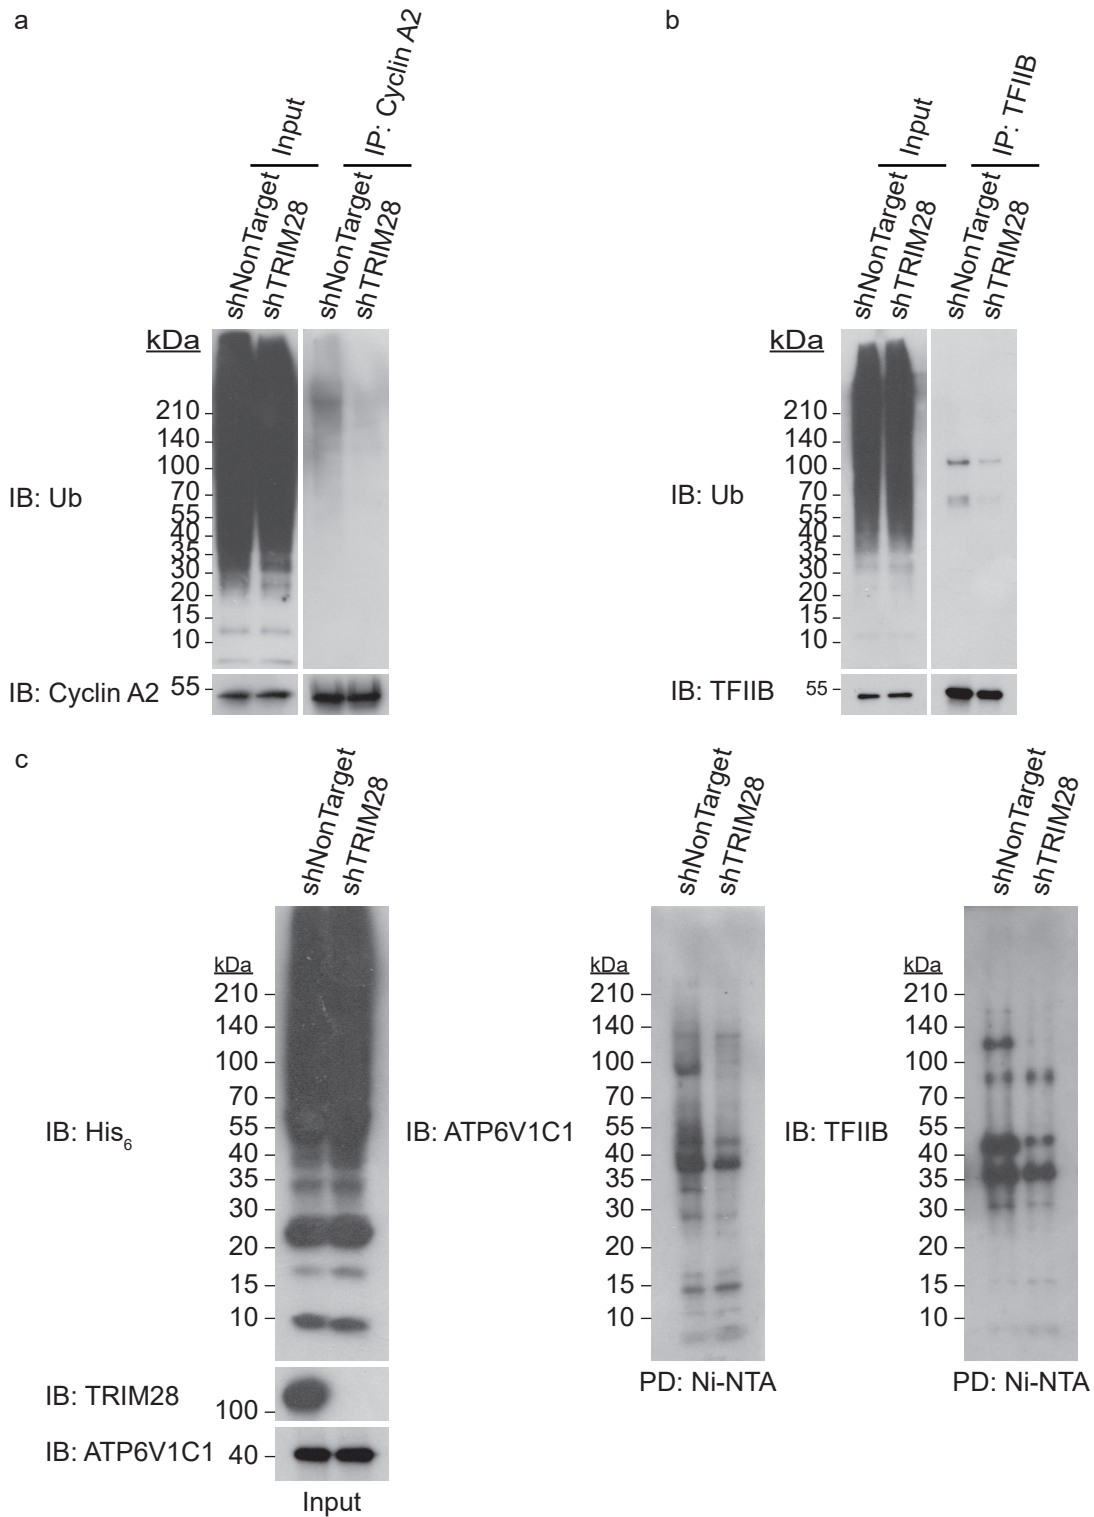

**a, b** HEK293T cells with stable knockdown of TRIM28 or corresponding control cells were harvested. Cell lysates were immunoprecipitated with an anti-Cyclin A2 antibody (a) or an anti-TFIIIB antibody (b). The precipitates were analyzed by immunoblotting using an anti-Ub antibody. **c** pQCXIH-3×His6-ubiquitin, which encodes 3 copies of His6-tagged ubiquitin, was transfected into HEK293T cells with stable knockdown of TRIM28 or corresponding control cells. Forty-eight h after transfection, cells were harvested. Cell lysates were pulled down with Probond resin. The cell lysates (input) were immunoblotted with anti-His6, anti-TRIM28 and anti-ATP6V1C1 antibodies (left). The precipitates were analyzed by immunoblotting with anti-ATP6V1C1 (middle) and anti-TFIIIB (right) antibodies.

**Supplementary Figure 4: Validation of the substrate candidates for Parkin and TRIM28 E3 ligases.**

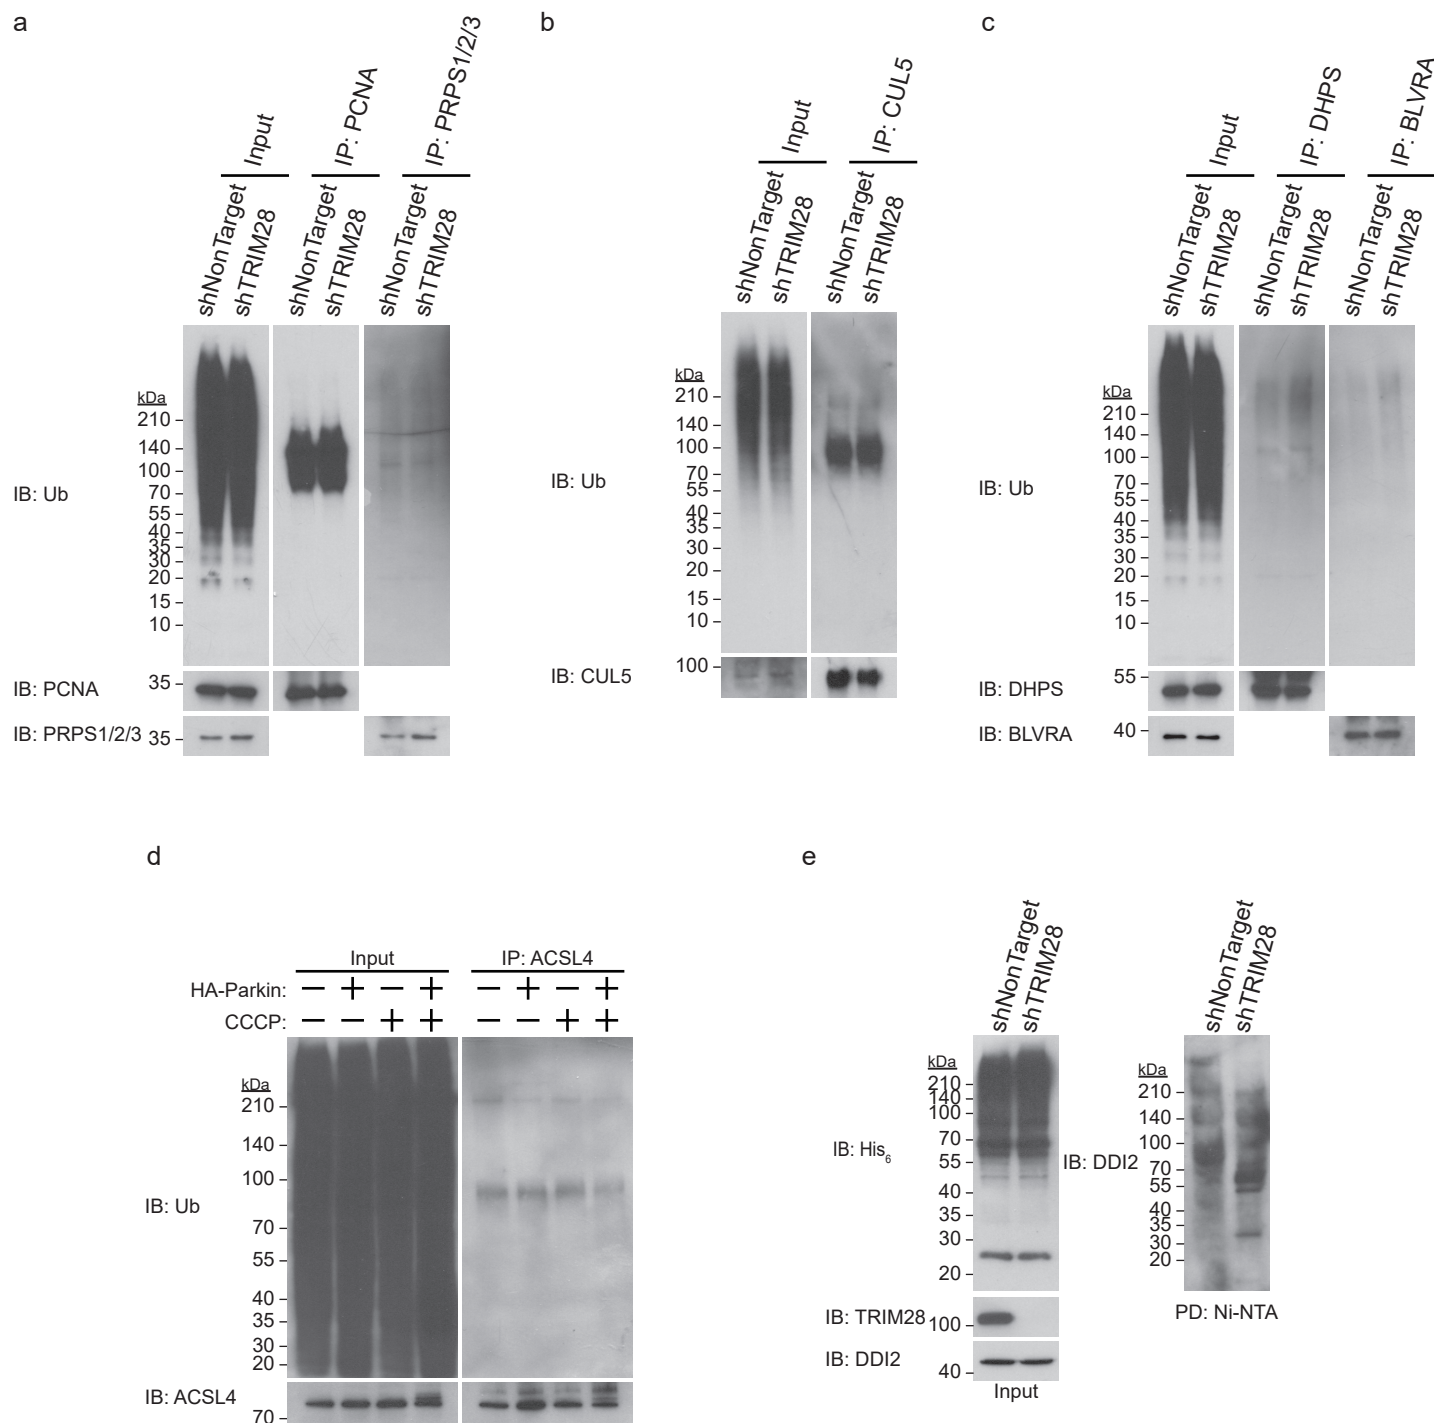

**a-c** HEK293T cells with stable knockdown of TRIM28 or corresponding control cells were harvested. Cell lysates were immunoprecipitated with an anti-PCNA antibody (a), an anti-PRPS1/2/3 antibody (a), an anti-CUL5 antibody (b), an anti-DHPS antibody (c), or an anti-BLVRA antibody (c). The precipitates were analyzed by immunoblotting with an anti-Ub antibody. **d** HEK293T cells stably expressing HA-Parkin or harboring an empty vector (Mock) were not treated with or were treated with CCCP (10  $\mu$ M) for 1 h. Cell lysates were immunoprecipitated with an anti-ACSL4 antibody. The precipitates were analyzed by immunoblotting with an anti-Ub antibody. **e** pQCXIH-3 $\times$ His<sub>6</sub>-ubiquitin was transfected into HEK293T cells with stable knockdown of TRIM28 or corresponding control cells. Forty-eight h after transfection, cells were harvested. Cell lysates were pulled down with Probond resin. The precipitates were analyzed by immunoblotting with an anti-DDI antibody.

**Supplementary Figure 5: Landscape of the substrate candidates for Parkin and TRIM28 E3 ligases.**

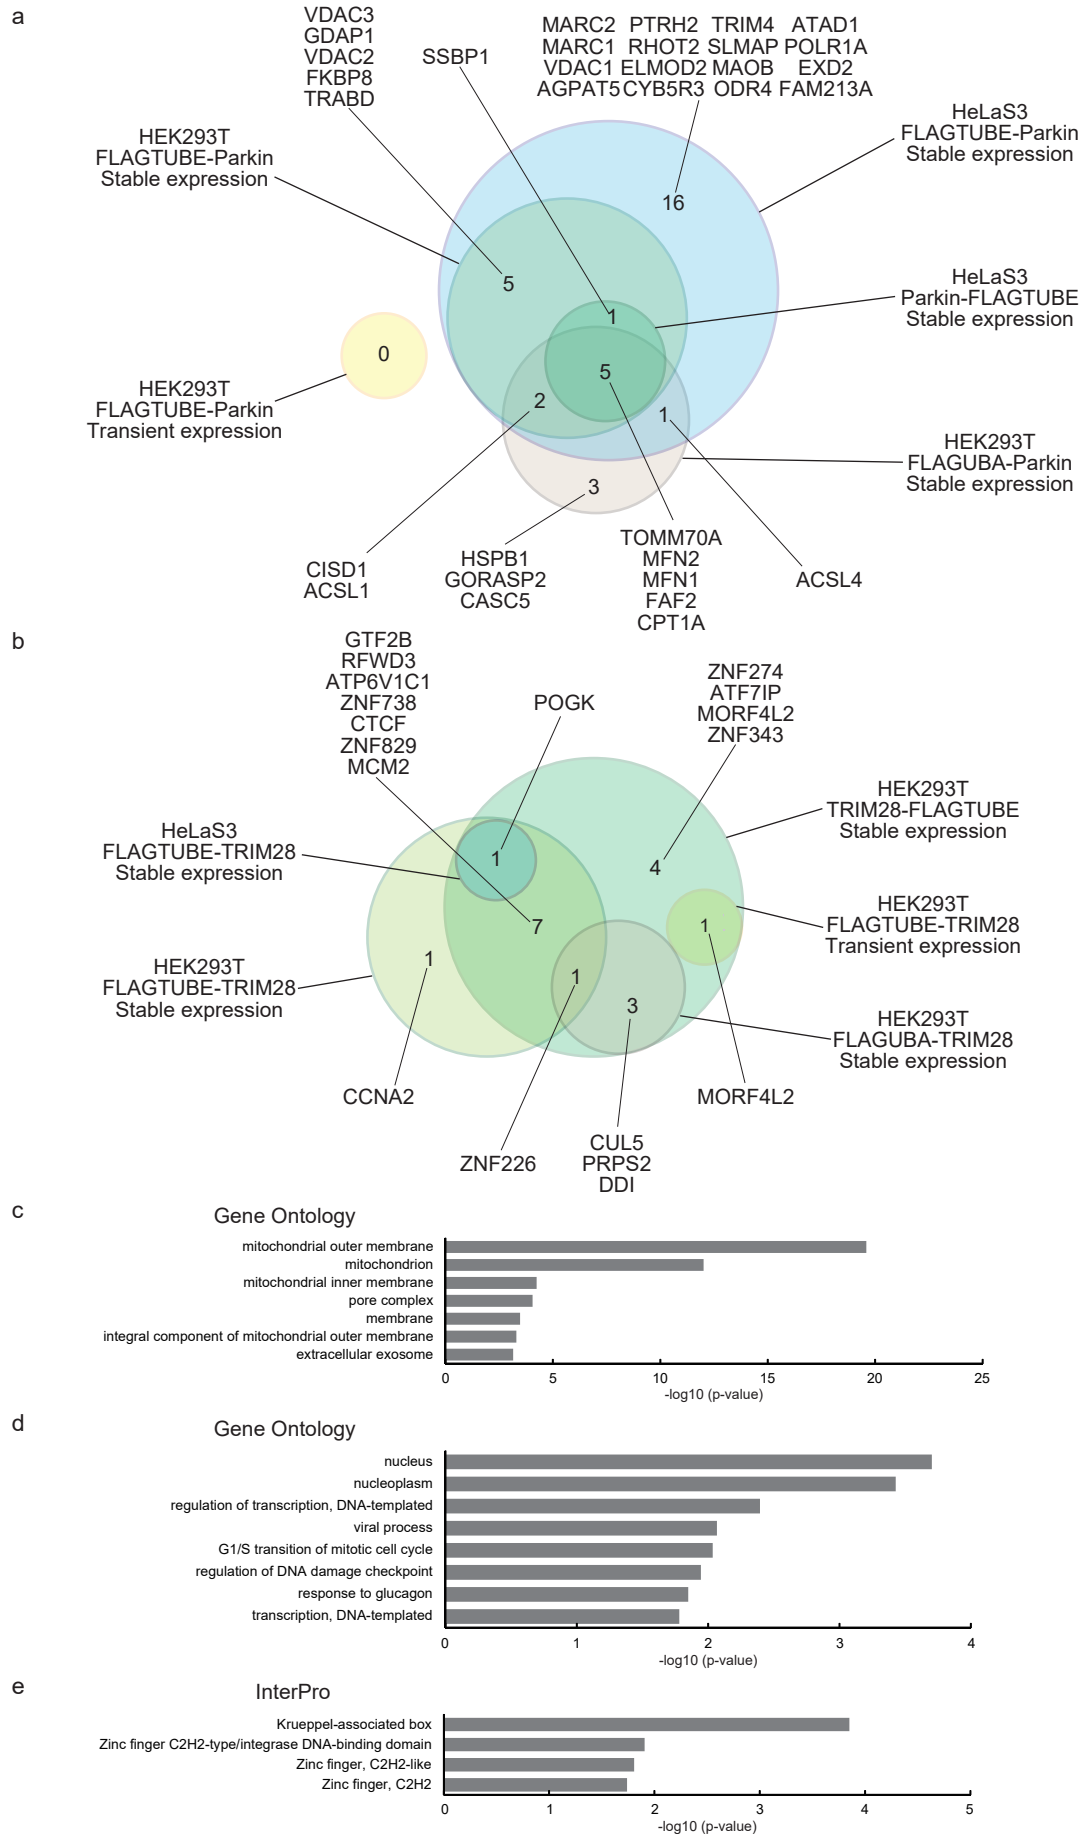

**a, b** Summary of identified substrate candidates in Parkin (a) and TRIM28 experiments (b). **c-e** Gene-annotation enrichment analysis for substrate candidates of Parkin (c) and TRIM28 (d, e). Gene Ontology cellular component (c), biological process (d) or InterPro (e) annotations enriched among the set of candidate proteins were identified using the DAVID Bioinformatics database. Graph shows the  $-\log_{10}(\text{p-value})$  for each term.

# Supplementary Figure 6: Full images of immuno blots

Fig. 1c IB: Ub

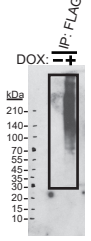

Fig. 1c IB: FLAG

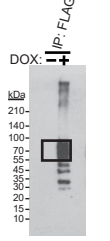

Fig. 1h IB: MFN2

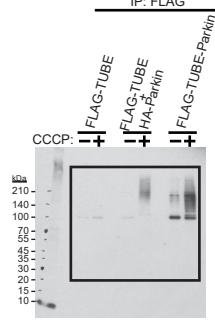

Fig. 1h IB: CISD1

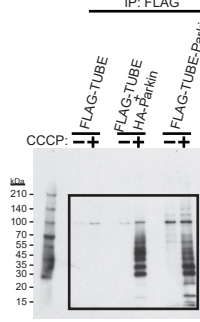

Fig. 1i IB: TFIIB

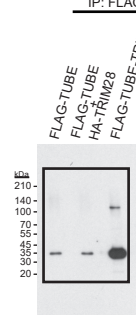

Fig. 1i IB: cyclin A2

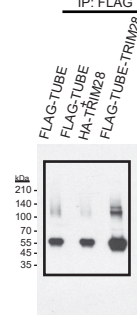

Fig. 2f IB: MFN2

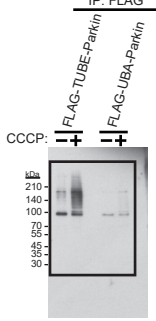

Fig. 2f IB: CISD1

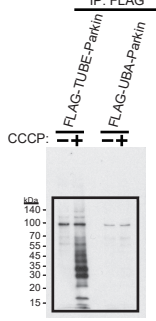

Fig. 3f IB: MFN2

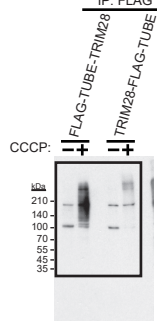

Fig. 3f IB: CISD1

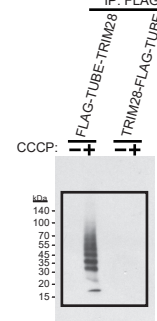

Fig. 2g IB: CTCF

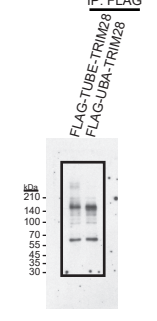

Fig. 2g IB: cyclin A2

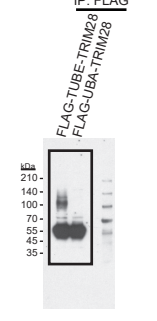

Fig. 3g IB: cyclin A2

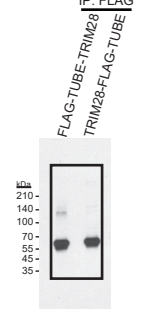

Fig. 3g IB: ATP6V1C1

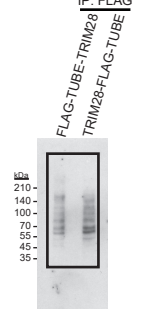

Fig. 4c IB: Ub

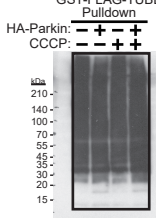

Fig. 4c IB: CISD1

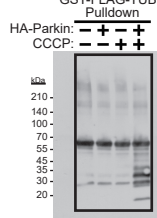

Fig. 4c IB: CPT1A

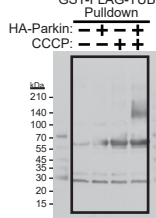

Fig. 4c IB: MFN2

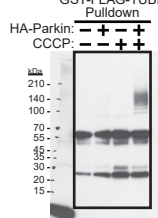

Fig. 4d IB: Ub

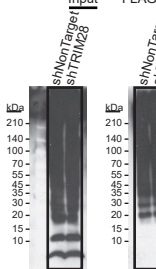

Fig. 4d IB: TRIM28

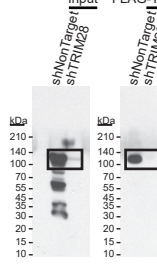

Fig. 4d IB: CCNA2

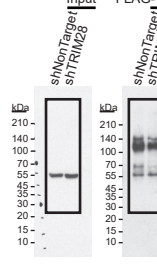

Fig. 4d IB: TFIIB

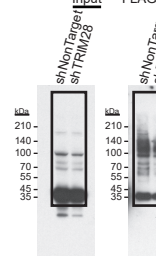

Fig. 4d IB: ATP6V1C1

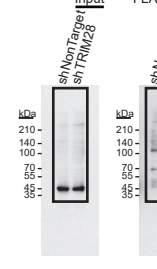

Fig. 5a

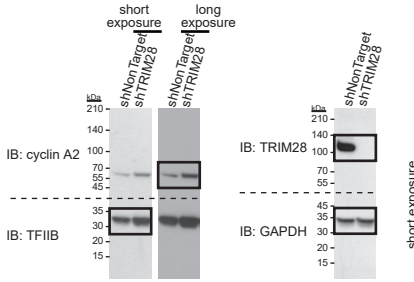

Fig. 5b

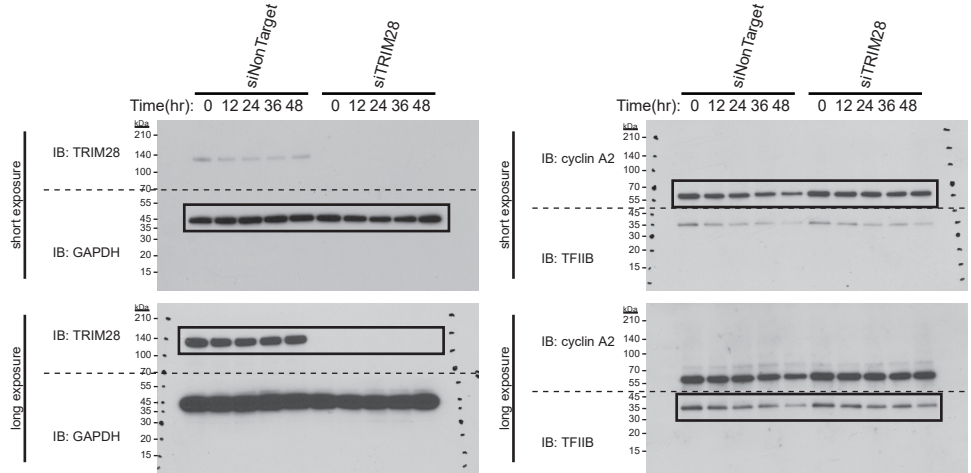

Fig. 5c

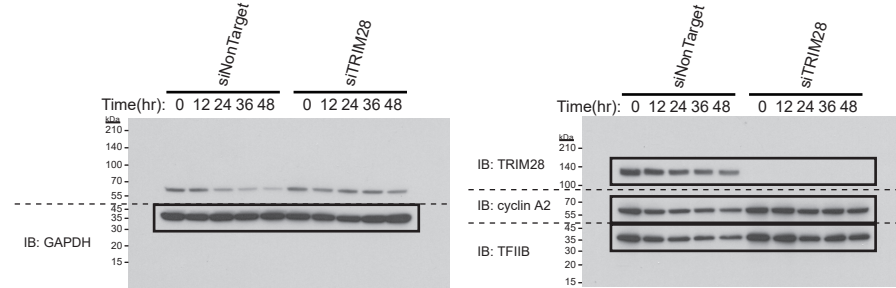

Fig. 5d

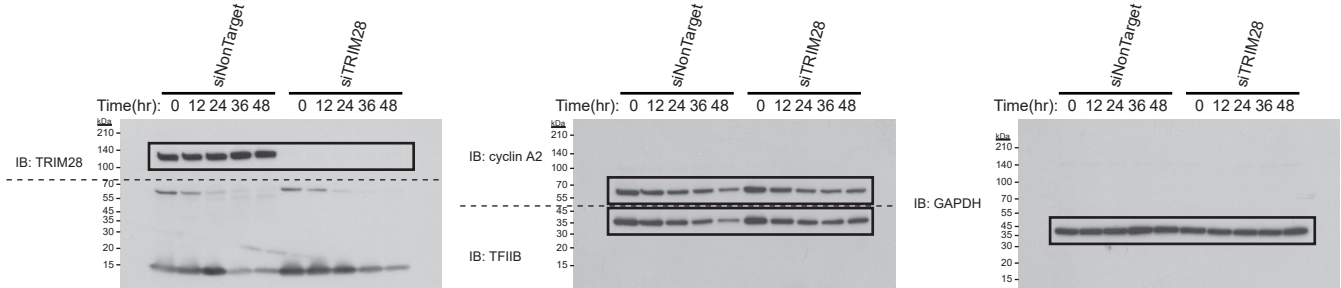

Fig. 5e

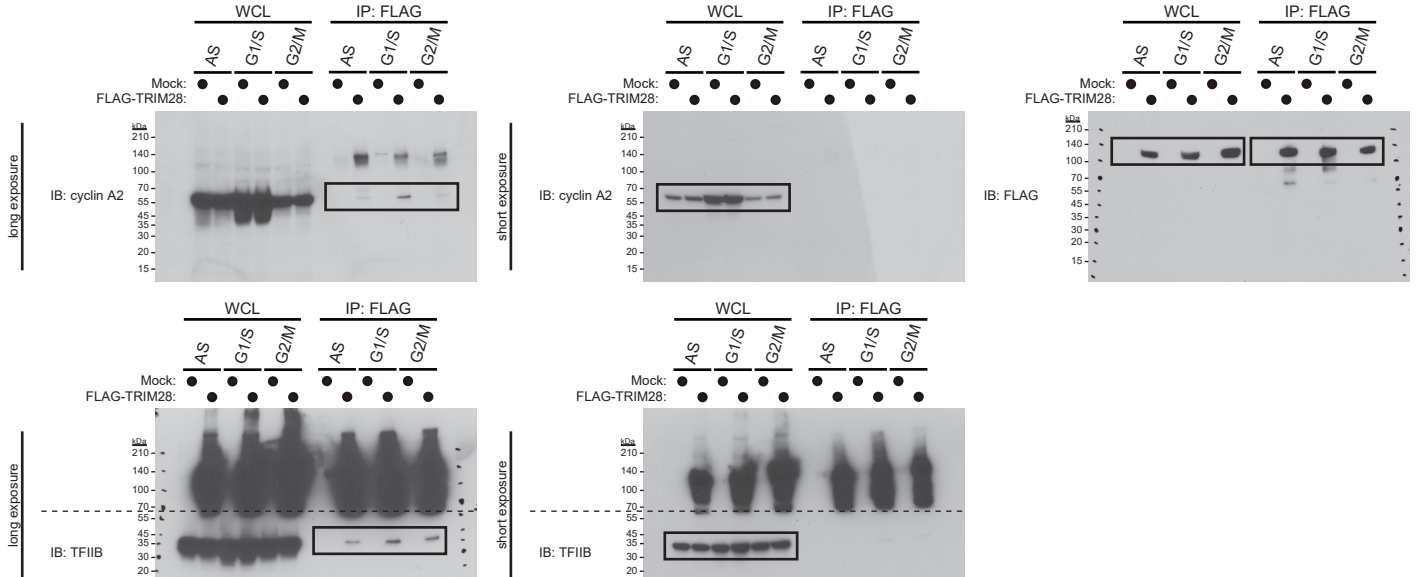

Supplementary Figure 1e

IB: MFN2

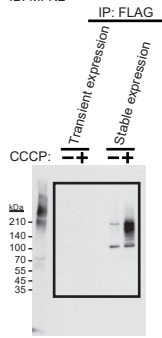

Supplementary Figure 1e

IB: CISD1

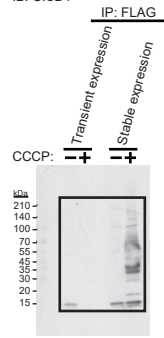

Supplementary Figure 1f

IB: TFIIIB

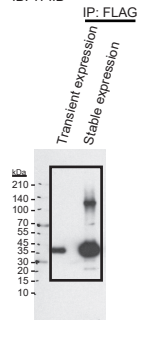

Supplementary Figure 1f

IB: ATP6V1C1

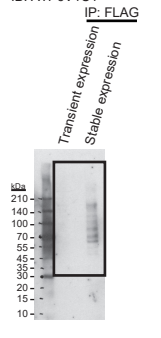

Supplementary Figure 2f

IB: MFN2

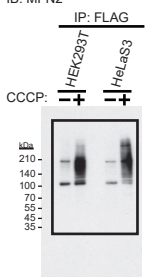

Supplementary Figure 2f

IB: CISD1

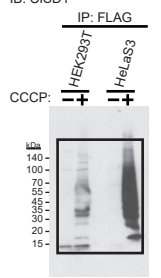

Supplementary Figure 2f

IB: FLAG

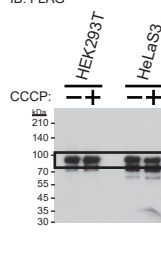

Supplementary Figure 2f

IB: HSP90

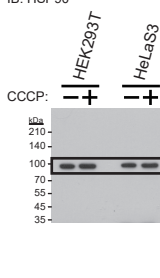

Supplementary Figure 2g

IB: TFIIIB

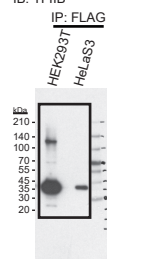

Supplementary Figure 2g

IB: ATP6V1C1

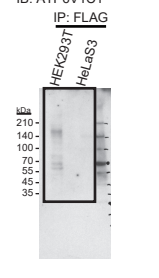

Supplementary Figure 2g

IB: FLAG

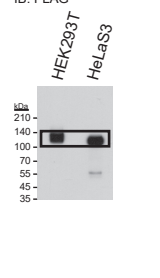

Supplementary Figure 2g

IB: HSP90

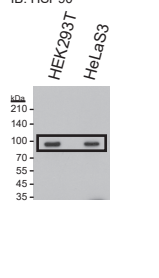

Supplementary Figure 3a

IB: Ub

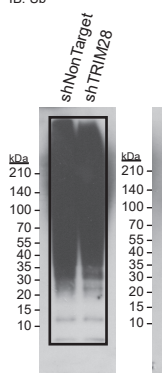

Supplementary Figure 3a

IB: cyclin A2

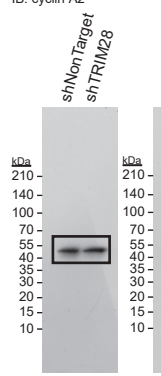

Supplementary Figure 3b

IB: Ub

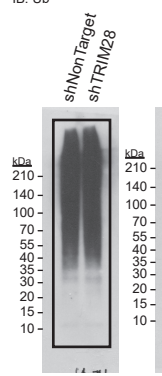

Supplementary Figure 3b

IB:TFIIIB

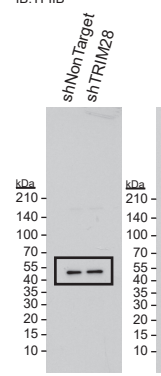

Supplementary Figure 3c

IB: His6

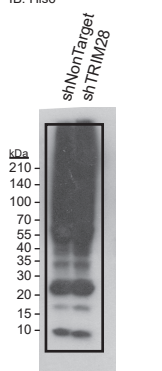

Supplementary Figure 3c

IB: TRIM28

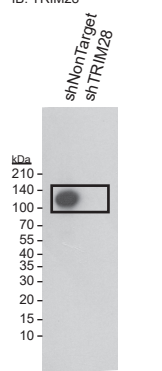

Supplementary Figure 3c

IB: TFIIIB

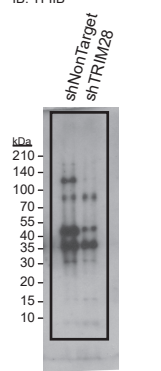

Supplementary Figure 3c

IB: ATP6V1C1

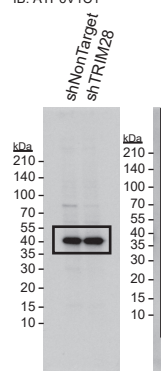



Supplementary Figure 4a  
IB: Ub

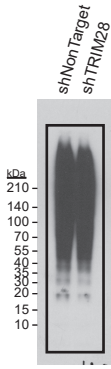

Supplementary Figure 4a  
IB: Ub

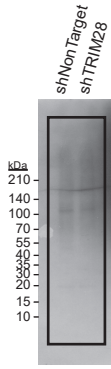

Supplementary Figure 4a  
IB: PRPS1/2/3

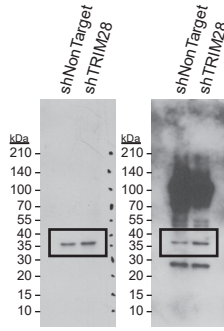

Supplementary Figure 4a  
IB: Ub

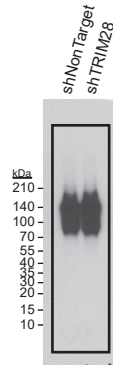

Supplementary Figure 4a  
IB: PCNA

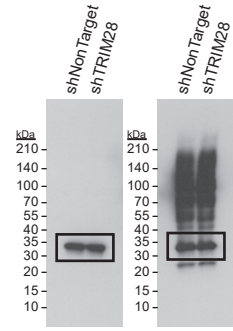

Supplementary Figure 4b  
IB: Ub

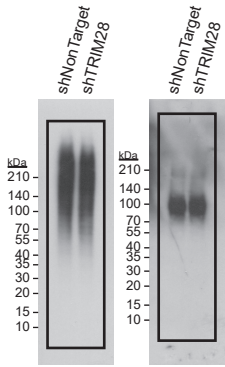

Supplementary Figure 4b  
IB: CUL5

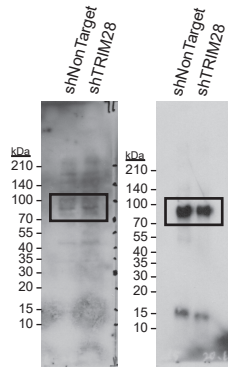

Supplementary Figure 4c  
IB: Ub

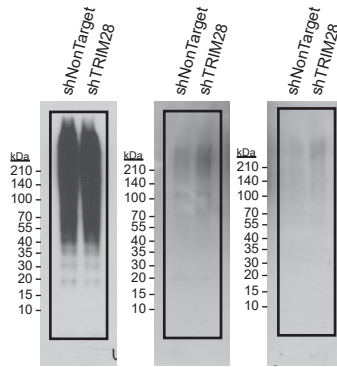

Supplementary Figure 4c  
IB: DHPS

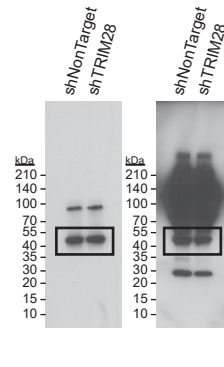

Supplementary Figure 4c  
IB: BLVRA

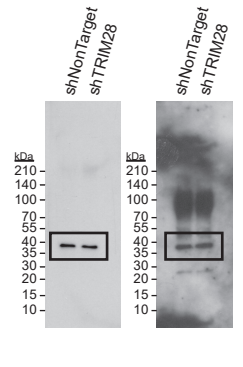

Supplementary Figure 4d  
IB: Ub

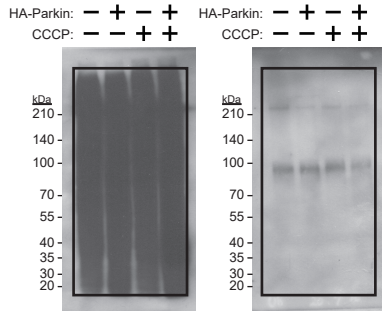

Supplementary Figure 4d  
IB: ACSL4

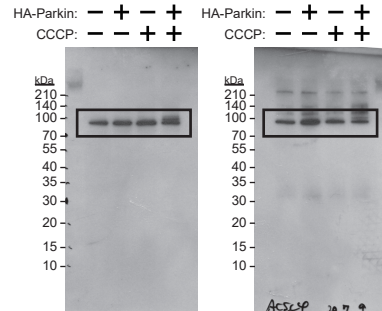

Supplementary Figure 4e  
IB: His6

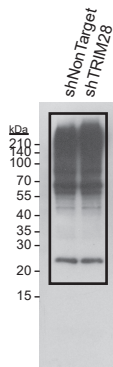

Supplementary Figure 4e  
IB: TRIM28

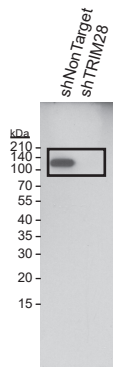

Supplementary Figure 4e  
IB: DD12

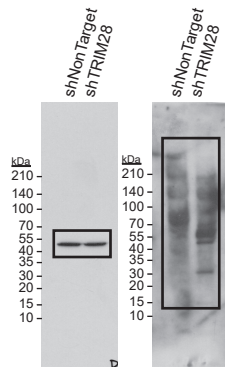

Supplement: 42003_2020_1328_MOESM1_ESM.pdf [file 42003_2020_1328_MOESM1_ESM.pdf]
